# Supplementary material for: Tin Mesoporphyrin Selectively Reduces Non-Small-Cell Lung Cancer Cell Line A549 Proliferation by Interfering with Heme Oxygenase and Glutathione Systems
Source: MDPI journal article supplement (doi:10.3390/biom11060917), 2021-06-21
Supplement: s1 [file s1]

## SUPPLEMENTARY MATERIALS

# Tin Mesoporphyrin selectively reduces the non-small-cell lung cancer cell line A549 proliferation by interfering with heme oxygenase and glutathione systems

Sorrenti V.<sup>1</sup>, D'Amico A. G.<sup>1,\*</sup>, Barbagallo I.<sup>1</sup>, Consoli V.<sup>1</sup>, Grosso S.<sup>1</sup>, Vanella L.<sup>1</sup>

<sup>1</sup>Department of Drug and Health Sciences, University of Catania, Catania, Italy; e-mail@e-mail.com

\*Correspondence: [agata.damico@unict.it](mailto:agata.damico@unict.it)

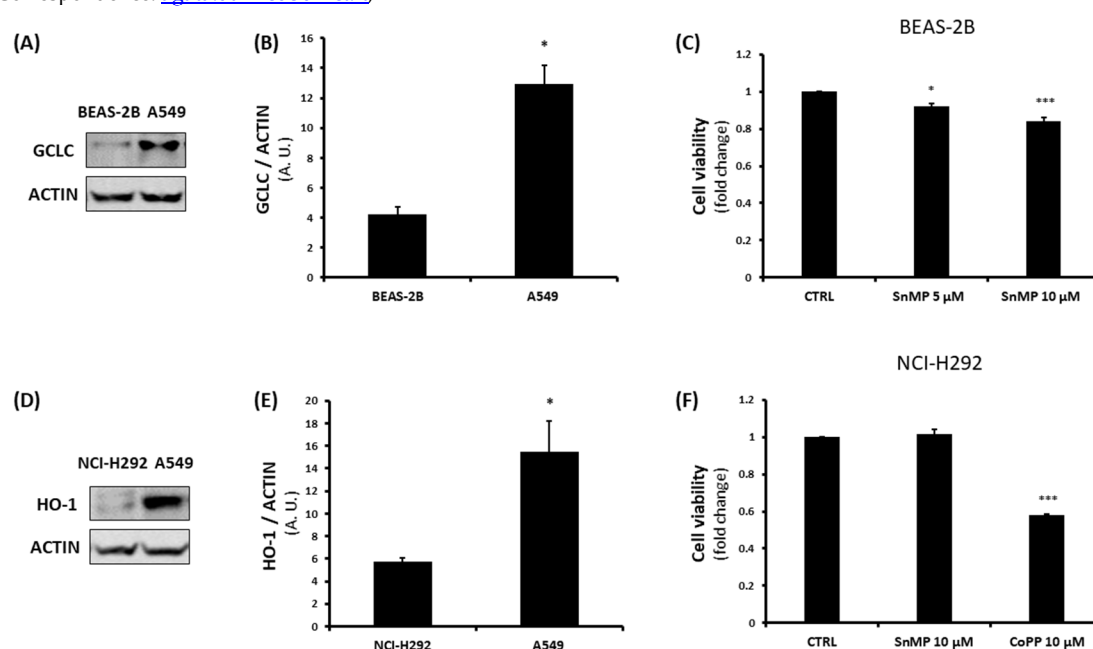

**Figure S1.** (A,B) Evaluation of GCLC basal levels on healthy human bronchial epithelial (BEAS-2B) and human lung adenocarcinoma (A549) cell lines (\* $p < 0.05$  vs BEAS-2B). (C) Assessment of SnMP (5  $\mu$ M, 10  $\mu$ M) effect on BEAS-2B cell viability (\*\* $p < 0.001$ , \* $p < 0.05$  vs CTRL). (D,E) HO-1 basal levels on human mucoepidermoid carcinoma (NCI-H292) and human lung adenocarcinoma (A549) cell lines (\* $p < 0.05$  vs NCI-H292). (F) Effect of SnMP (10  $\mu$ M) and CoPP (10  $\mu$ M) on NCI-H292 cell viability (\*\* $p < 0.001$  vs CTRL). Results are expressed as mean  $\pm$  SEM.

**Table S1. Primers Sequence**

| Gene  | Primer Forward         | Primer Reverse         |
|-------|------------------------|------------------------|
| GAPDH | AGACACCATGGGGAAGGTGA   | TGGAATTGCCATGGGTGGA    |
| GCLC  | ACTTCATTCCAGTACCTTAACA | CCGGCTTAGAAGCCCTTGAA   |
| HO-1  | AAGACTGCGTTCCTGCTCAAC  | AAAGCCCTACAGCAACTGTCTG |
